# Supplementary material
Source: PubMed Central journal article supplement (PMC7519391)
Supplement: pnas.2006283117.sapp.pdf [file pnas.2006283117.sapp.pdf]

## SI Appendix

### Method S1

**Engineering the genome of *Vibrio cholerae*.** All the recombinant vectors were developed using restriction enzymes and T<sub>4</sub> DNA ligase (NEB, USA). Desired DNA fragments were PCR amplified by using high fidelity Taq DNA polymerase (NEB, USA). *E. coli* FCV14 was used as the cloning host. All gene deletions and replacements were performed via homologous recombination using the derivatives of suicide vectors pKAS32 or pDS132 (1, 2). *E. coli*  $\beta$ 2163 was used as a donor strain and *V. cholerae* N16961 or its derivatives were used as a recipient strain. For all gene deletions, around 500 to 700 base pair (bp) homologous regions upstream and downstream of the respective open reading frame were PCR amplified using the specific primer combinations (*SI appendix, Table S3*).

For removing different GIs (genomic islands) from the *V. cholerae* genome, first a part of GI was PCR amplified and then cloned into a cloning vector pSW23T (*SI appendix, Table S1*). The recombinant vector was used as a template for inverse PCR for replacing a part of the cloned DNA fragment with the *sacB-cat* or *sacB-cat-lacZ* allele. Finally, the recombinant vector carrying *sacB-cat* or *sacB-cat-lacZ* allele flanked by the up stream and down stream regions of the interested GI was transferred to the recipient *V. cholerae* strain by conjugation. The vector integrated in the GI through homologous recombination. The first-cross over strain carrying recombinant vector in the GI became resistant to chloramphenicol but sensitive to streptomycin and sucrose. The second crossover strain carrying only *sacB-cat* or *sacB-cat-lacZ* in the GI without plasmid backbone was isolated by growing the strain on to LA plates supplemented with streptomycin (1 mg/ml) with or without X-gal. Finally, the *V. cholerae* strain without GI in the chromosome was isolated by growing cells on the LA plate supplemented with 15% sucrose. The GI excised strains were confirmed by sensitivity to chloramphenicol and further confirmed by PCR with specific primer sets (*SI appendix, Table S3*), one primer from the core genome and another from of the GI integration site region (**Fig. 3**).

**Recombinant vectors construction:** For *lexA* gene deletion, recombinant vector pAP17 was constructed from previously used vector pBS52 (3). The region carrying upstream and downstream of *lexA* along with *aphI* gene, in between, was PCR amplified from pBS52 using primers 878-879 (*SI appendix, Table S3*). It was digested with XbaI and ligated into similarly digested pDS132.

35 The suicide plasmid, pAP8 carrying upstream and downstream regions of *recA* of *V.*  
36 *cholerae* N16961 was constructed to delete *recA* gene from VCE232. *aph1* gene  
37 cassette was digested from pUC4K using PstI to introduce into similarly digested  
38 pDA2 and named as pAP8. Similarly, to delete *recA* from Classical O395, pAP16 was  
39 constructed. Upstream region of *recA* was PCR amplified from O395 strain using  
40 primers 729-754 (*SI appendix, Table S3*) and introduced into pUC18 after digestion  
41 with SacI and KpnI to generate pAP13. *aph1* gene was amplified from pUC4K using  
42 primers 756-757 (*SI appendix, Table S3*), was digested with KpnI and SphI and  
43 inserted within pAP13 and named as pAP14. Subsequently, the downstream region of  
44 *recA* was amplified using primers 755-730 (*SI appendix, Table S3*) and digested with  
45 SphI and XbaI to introduce into similarly digested pDS132 to construct pAP15. The  
46 upstream region of *recA* along with *aph1* gene was digested from pAP14 using SacI  
47 and SphI and inserted into similarly digested pAP15, to finally generate pAP16.  
48 To construct pAP7, RS2 region from the genome of CTX $\phi$  of environmental strain  
49 VCE232 was PCR amplified using primers 500-501 (*SI appendix, Table S3*), further  
50 digested with EcoRI and NotI & cloned into similarly digested vector pSW23T.  
51 Similarly, RS2 region from the genome of CTX $\phi$  of O139 strain SG24 was amplified  
52 by using primers 679-680 (*SI appendix, Table S3*), further digested with PstI and  
53 XbaI & cloned in pSW23T, to develop pAP9. The *cat* gene in pBD56 was replaced  
54 with AmpR obtained from pEM7 using PvuII and NcoI. The vector was named as  
55 pAP10.  
56 To introduce point mutation [Tyrosine replaced with Phenylalanine (T1204A)] within  
57 *rstA* gene, inverse PCR of pBS66 was done by using primers 1106-1107 (*SI appendix,*  
58 **Table S3**) followed by PNK treatment for subsequent ligation. The vector was  
59 designated as pAP21.  
60 In order to delete the entire VSP-1, we first PCR amplified the *VC0177* - *VC0178*  
61 using 861 and 862 primers and cloned into the *NotI* and *SacI* sites of pSW23T to  
62 make pSB29 which was then used as a template for inverse PCR with 863 and 864  
63 primers. Simultaneously the *sacB-cat* region was PCR amplified from pDS132 with  
64 869 and 870 primers. This *sacB-cat* region was digested with *NruI* and *NsiI* and  
65 ligated into the similarly digested inverse PCR product and the clone was named as  
66 pSB30. Then the *sacB-cat* region flanked by the *VC0177* and *VC0178* was sub-cloned

67 from pSB30 to pKAS32 at the *NotI* and *SacI* sites and the final recombinant vector  
68 was named as pSB31.

69 To delete the entire VSP-2, *VC0500* was PCR amplified using 865 and 866 primers  
70 and cloned into the *NotI* and *XbaI* sites of pSW23T to make pBIP13, which was then  
71 used as a template for inverse PCR with 867 and 868 primers. The *sacB-cat* region  
72 was PCR amplified from pDS132 with 870 and 871 primers. The *sacB-cat* amplicon  
73 was digested with *XhoI* and *NsiI* and ligated into the similarly digested inverse PCR  
74 product and the clone was named as pBIP15. Furthermore, the *sacB-cat* region  
75 flanked by the up stream and down stream region of *VC0500* was sub-cloned from  
76 pBIP17 to pKAS32 at the *NotI* and *XbaI* sites and the final recombinant vector was  
77 named as pBIP38.

78 In order to delete the entire VPI-1, we first PCR amplified the *VC0826 - VC0829*  
79 using 947 and 948 primers and cloned into the *NotI* and *SacI* sites of pSW23T to  
80 make pSB35 which was then used as a template for inverse PCR with 949 and 950  
81 primers. Simultaneously the *sacB-cat* region was PCR amplified from pDS132 with  
82 869 and 951 primers. This *sacB-cat* region was digested with *NruI* and *XhoI* and  
83 ligated into the similarly digested inverse PCR product and the clone was named as  
84 pSB36. Furthermore, the *sacB-cat* region flanked by the *VC0827* and *VC0828* was  
85 sub-cloned from pSB36 to pKAS32 at the *NotI* and *SacI* sites and the final  
86 recombinant vector was named as pSB37.

87 To delete the entire VPI-2, *VC1796-VC1797* was PCR amplified using 910 and 911  
88 primers (*SI appendix, Table S3*) and cloned into the *NotI* and *SacI* sites of pSW23T  
89 to make pSB32, which was then used as a template for inverse PCR with 912 and 913  
90 primers (*SI appendix, Table S3*). The *sacB-cat* region was PCR amplified from  
91 pDS132 with 869 and 870 primers. The *sacB-cat* amplicon was digested with *NruI*  
92 and *NsiI* and ligated into the similarly digested inverse PCR product and the clone  
93 was named as pSB33. Furthermore, the *sacB-cat* region flanked by the *VC1796* and  
94 *VC1797* was sub-cloned from pSB33 to pKAS32 at the *NotI* and *SacI* sites and the  
95 final recombinant vector was named as pSB34.

96 For the deletion of entire SXT element, around 1kbp upstream and downstream  
97 sequences of *s053* region of SXT were PCR amplified using primers 1076-1108 and  
98 1109-1110, respectively (*SI appendix, Table S3*) and cloned to generate pSM19.  
99 Inverse PCR of pSM19 was performed using primers 1220-1221 (*SI appendix, Table*  
100 **S3**). The *aadA* gene was PCR amplified using primers 1222-1223 and introduced

101 within pSM19 by digesting XbaI and NdeI, to generate pJV36. PCR, restriction  
102 digestion, agarose gel shift assay and DNA sequencing confirmed the recombinant  
103 vectors.

104 **Construction of VSP-1 deleted *V. cholerae* strain SB25.** pSB31 was conjugally  
105 transferred into N16961 for developing VSP-1::*sacB-cat* reporter strain adopting  
106 sequential allelic exchange method. The reporter strain SB23 carrying VSP-1::*sacB-*  
107 *cat* allele was confirmed by sucrose sensitivity, chloramphenicol resistance and PCR  
108 with 890 and 891 primers (*SI appendix, Table S3*). Finally, the VSP-1 deleted strain  
109 SB25 was isolated by selecting the overnight grown SB23 onto LA plate  
110 supplemented with 15% sucrose. This SB25 was confirmed by chloramphenicol  
111 sensitivity and PCR assay using 908 and 909 primers (*SI appendix, Table S3*).

112 **Construction of VSP-2 deleted *V. cholerae* strain DD2.**

113 Recombinant vector pBIP38 was conjugally transferred into the N16961 for tagging  
114 VSP-2 with the *sacB-cat* allele by similar allelic exchange method. The N16961  
115 derivative carrying *sacB-cat* tagged VSP-2 was named DD1. Sucrose sensitivity,  
116 chloramphenicol resistance and PCR with 927 and 928 primers (*SI appendix, Table*  
117 **S3**) confirmed DD1. Finally, the VSP-2 deleted strain DD2 was isolated by plating  
118 the over night grown DD1 onto LA plate supplemented with 15% sucrose. This DD2  
119 was further confirmed by chloramphenicol sensitivity and PCR assay.

120 **Construction of VPI-1 deleted *V. cholerae* strain SB31.**

121 For developing VPI-1::*sacB-cat* reporter strain, the pSB37 was conjugally transferred  
122 into the N16961. The vector was integrated in the intergenic region of *VC0827* and  
123 *VC0828* by homologous recombination. Subsequent allelic exchange experiment was  
124 used to remove the vector backbone and develop SB30. We confirmed VPI-1::*sacB-*  
125 *cat* genotype by sucrose sensitivity, chloramphenicol resistance and PCR assay (**Fig.**  
126 **3**). Finally, the VPI-1 deleted strain SB31 was isolated by selecting the overnight  
127 grown SB30 onto LA plate supplemented with 15% sucrose. Chloramphenicol  
128 sensitivity and PCR assay further confirmed SB31.

129 **Construction of VPI-2 deleted *V. cholerae* strain SB27.** To delete the VPI-2,  
130 pSB34 was conjugally transferred into the N16961 in which the VPI-2 was tagged  
131 with the *sacB-cat* region by replacing the intergenic region of *VC1796* and *VC1797*  
132 and this strain was named as SB26 which was confirmed by sucrose sensitivity,  
133 chloramphenicol resistance and PCR with 925 and 926 primers (*SI appendix, Table*  
134 **S3**). Finally the VPI-2 deleted strain SB27 was isolated by plating the over night

135 grown SB26 onto LA plate supplemented with 15% sucrose. This SB27 was further  
136 confirmed by chloramphenicol sensitivity and PCR assay (**Fig. 3**).

137 **Construction of SXT deleted *V. cholerae* strain.** For the deletion of SXT element in  
138 the host strain *V. cholerae* O1 Ogawa 41081 the construct pJV36 was used. The Stp<sup>S</sup>  
139 host strain *V. cholerae* O1 Ogawa 41081 was made Stp<sup>R</sup> by growing the strain in the  
140 presence of sub lethal concentration of streptomycin (5 ug/ml). The streptomycin  
141 resistant mutant strain was then used for the subsequent experiments. The final  
142 construct pJV36 (*SI appendix, Table S1*) was conjugally transferred to the host  
143 bacterium. The SXT was tagged with the *sacB-aadA* cassette by replacing the s053  
144 region and this strain was named as JV3 (**Table 1**), which was confirmed by sucrose  
145 sensitivity, spectinomycin resistance and PCR with 1119 and 1120 primers (*SI*  
146 *appendix, Table S3*). Finally, the SXT deleted strain JV4 was isolated by plating the  
147 over night grown JV3 onto LA plate supplemented with 15% sucrose. This JV4 was  
148 further confirmed by spectinomycin sensitivity and PCR using primers 1046 and 1234  
149 specific for the SXT integrase gene (*SI appendix, Table S3*).

150 **Construction of VSP-1 and VSP-2 deleted N16961 derivative SB33.** Recombinant  
151 strain SB33 was developed by sequentially deleting the VSP-1 and VSP-2 from  
152 N16961 as described above. First VSP-1 was deleted from N16961 and the strain was  
153 named as SB25, then VSP-2 of SB25 was flagged with *sacB-cat* by deleting *VC0500*  
154 and the strain was named as SB32. Finally, growing the SB32 onto LA plate  
155 supplemented with 15% sucrose isolated SB33, which was devoid of both VSP-1 and  
156 VSP-2.

157 **Construction of other genetically modified *V. cholerae* strains.** In order to flag the  
158 pathogenicity islands with *sacB-cat-lacZ*, firstly endogenous *lacZ<sub>Vc</sub>* were deleted from  
159 SB27, SB31 and SB33 by using pBD50 (*SI appendix, Table S1*) and the strains were  
160 named as SB42, SB43 and SB44, respectively (**Table 1**). *lacZ<sub>Ec</sub>* was cloned at the  
161 *NruI* site of pSB37 and pSB34 to make pSB43 and pSB44, respectively (*SI appendix,*  
162 **Table S1**). pSB43 was used to develop SB45 and SB51, whereas pSB44 were used to  
163 develop SB46 and SB49 (**Table 1**). SB45, SB46, SB49 and SB51 were grown in LB  
164 and plated onto sucrose plate to isolate the SB47, SB48, SB50 and SB52, respectively  
165 (**Table 1**).

166 For the co-culture and growth competition assays streptomycin resistant *V. cholerae*  
167 strains N16961, SB25, DD2, SB33 and SB52 were tagged with a chloramphenicol  
168 resistance gene by using pBD60 (*SI appendix, Table S1*) and the strains were name as

169 SB56, SB58, SB59, SB60 and SB63 respectively (**Table 1**). Similarly, N16961 and  
170 O395 were also tagged with zeocin resistance by using pBD61 and pBD66 (4) and the  
171 strains were designated as SB57 and SB62, respectively (**Table 1**).

172 For the construction of  $\Delta lexA$  mutant strain, the recombinant vector, pAP17 was  
173 introduced into N16961 and its derivatives by conjugation. and The transconjugants  
174 were selected in the presence of chloramphenicol. Exchange of the native allele with  
175  $\Delta lexA:: aph1$  allele present on plasmid backbone was confirmed by PCR and UV  
176 sensitivity. Recombinant vectors pAP8 and pAP16, the derivatives of suicide vector  
177 pDS132 carrying the  $\Delta recA:: aph1$  allele, were used for the construction of the  $\Delta recA$   
178 mutants AP8 and AP10 from environmental VCE232 and classical O395 *V. cholerae*  
179 strains, respectively, using allelic exchange strategy explained previously (3).  
180 Excision of the native allele was confirmed by chloramphenicol sensitivity, PCR and  
181 UV sensitivity assay. Similarly, the  $\Delta lexA \Delta recA$  double mutant strain was  
182 constructed by following allelic exchange method. Briefly, the recombinant vector  
183 pDA2 was introduced into  $\Delta lexA$  strain (BS20) by conjugation. The first crossovers  
184 were selected on the Stp (50  $\mu\text{g/ml}$ ) and Cam (2  $\mu\text{g/ml}$ ) containing selection plates  
185 and were replica plated on Stp<sub>50</sub>Cam<sub>2</sub> & Sucrose<sub>15%</sub> containing plates. The colony  
186 showing the sucrose sensitive phenotype was selected for the second crossover. The  
187 second crossovers were selected on Stp<sub>50</sub> Suc<sub>15%</sub> plates. Replica plating, UV  
188 sensitivity assay and PCR confirmed deletion of the native *recA* gene with plasmid  
189 backbone. The  $\Delta lexA \Delta recA$  double mutant strain was named as JV5.

190  
191  
192  
193  
194  
195  
196  
197  
198  
199  
200  
201  
202

Supplementary Figures

Figure S1

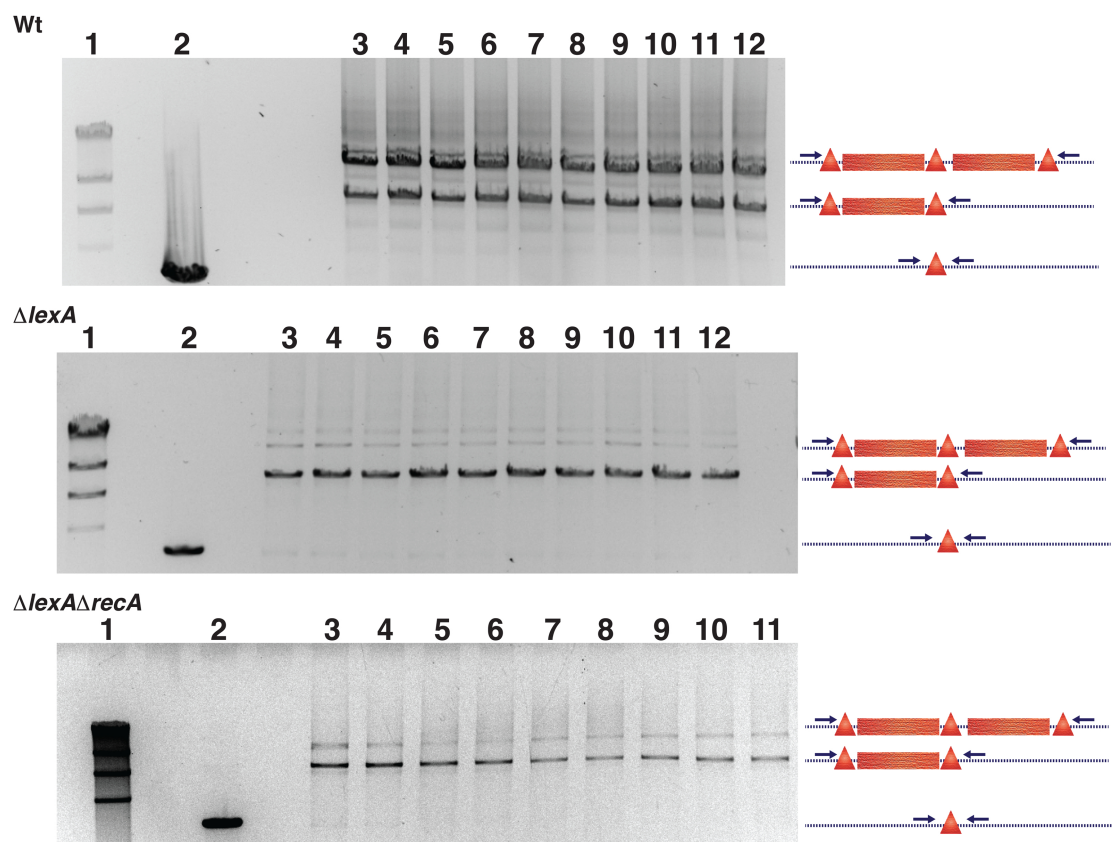

**Figure S1:** Single or multiple copies of integration of RS2 element (pBS66) in the *difI* site of *lexA* positive (a)  $\Delta lexA$  and (b)  $\Delta lexA \Delta recA$  *V. cholerae* strains. Integration copy numbers was measured by amplifying *difI* loci using set of primers that bind to the flanking sequences of *difI*. Single and double integrations produced ~8kb and ~12kb long DNA amplicons, respectively. Absence of integration produced ~3.5 kb long amplicon.  $\lambda$  genomic DNA digested with Hind III was used as size marker.

(a) Lane 1,  $\lambda$  HindIII; 2, BS1; 3-12, BS1::pBS66

(b) Lane 1,  $\lambda$  HindIII; 2, BS20; 3-12, BS20::pBS66

(c) Lane 1,  $\lambda$  HindIII; 2, JV5; 3-11, JV5::pBS66

243 **Figure S2**

244

245

246

247

248

249

250

251

252

253

254

255

256

257

258

259

260

261

262

263

264

265

266

267 **Figure S2:** Stability of replicative and integrative module (RS2) of CTX $\Phi$  in the  
268 presence and absence of *lexA* gene. The RS2 module was introduced into *V. cholerae*  
269 strains by conjugation. Replicative genome of RS2 was isolated by alkaline lysis  
270 method. Relevant genotype of the *V. cholerae* strains were mentioned on the top of  
271 each wells. Replicative RS2 DNA isolated from *E. coli* cell was used as control.

272

273

274

275

276

277

278

279

280

281

282

283

284

285

286

287

288

289

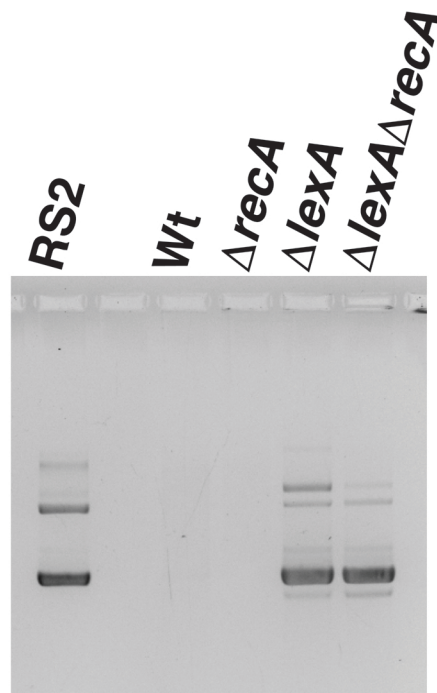



290 **Figure S3**

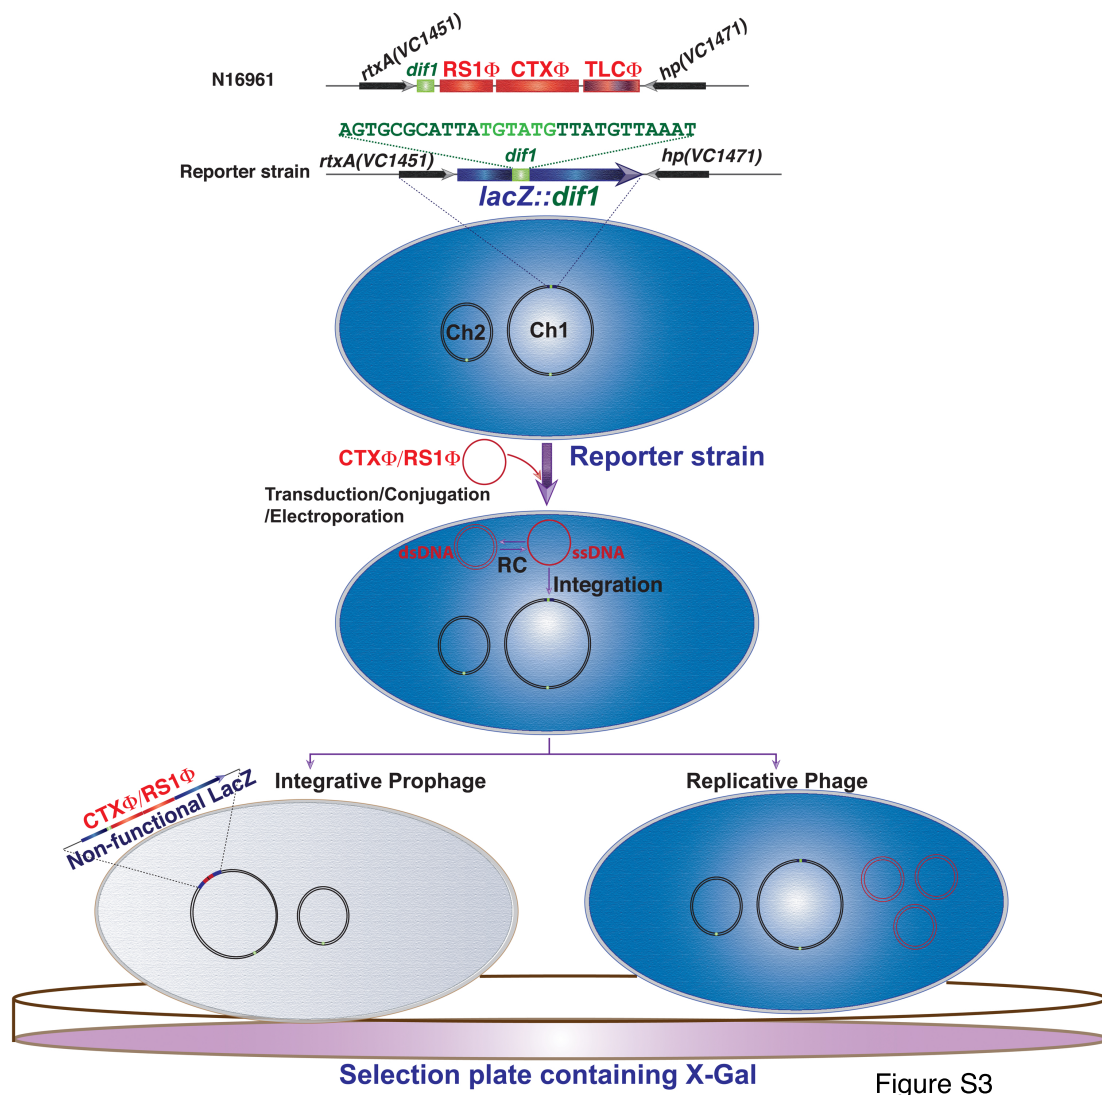

**Figure S3:** Schematic of CTX $\Phi$  integration in *Vibrio cholerae* reporter strain. The *dif1*-RS1-CTX-TLC prophage array has been replaced with a functional *lacZ-dif1* allele in an endogenous *lacZ* deleted *V. cholerae* strain adopting allelic exchange method. The CTX $\Phi$  or RS1 $\Phi$  was introduced into the reporter strain by conjugation. Once inside the host cytoplasm, the (+)ssDNA genome of the phages either converted into double stranded replicative DNA using host replication machinery or integrated into *lacZ-dif1* site by site-specific recombination exploiting XerC-XerD recombinases. Integration of CTX $\Phi$  at the *dif1* site in the *lacZ-dif1* allele abolished the  $\beta$ -galactosidase activity of the reporter strain and the colony turned white on the selection plate supplemented with 5-Bromo-4-chloro-3-indolyl  $\beta$ -D-galactopyranoside (X-Gal). Arrows and their directions indicate open reading frames and their transcription direction, respectively. RC=Rolling circle replication.

334 **Figure S4**

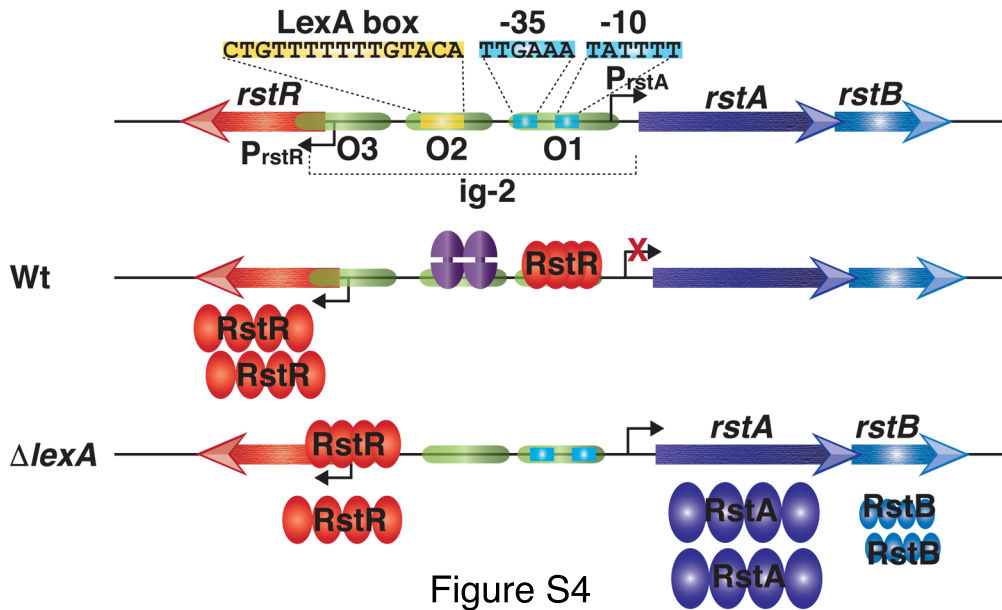

Figure S4

**Figure S4:** Overview of P<sub>rstA</sub> promoter region in the CTXΦ genome and LexA regulation. In normal physiological condition, the CTXΦ encoded repressor RstR and SOS regulator LexA binds to the P<sub>rstA</sub> promoter and repress the expression of RstA. Binding of LexA to the O2 operator site reduces the binding affinity of RstR on its own promoter (P<sub>rstR</sub>) and allows *rstR* transcription. In the absence of LexA, RstR binds to the O2 and O3 operator sites and thereby represses the transcription from P<sub>rstR</sub> promoter. Reduced level of RstR derepresses transcription from P<sub>rstA</sub> and produces high-level of RstA. Elevated level of RstA initiates rolling circle replication in the integrated CTXΦ.

379  
380  
381

**Supplementary Tables**

**Table S1:** Plasmids used in the present study

| Plasmids | Genotype and Phenotype                                                  | References                      |
|----------|-------------------------------------------------------------------------|---------------------------------|
| pKAS32   | <i>oriR6K mobRP4 rpsL bla</i> ; conjugative vector, Amp <sup>r</sup>    | (1)                             |
| pSW23T   | pSW23: <i>oriT</i> RP4 <i>oriV</i> R6K, Cam <sup>r</sup>                | (2)                             |
| pDS132   | <i>oriR6K mobRP4 sacB cat</i> ; conjugative vector, Cam <sup>r</sup>    | Laboratory collection           |
| pCR2.1   | pBR322 <i>ori</i> , cloning vector, Amp <sup>r</sup> , Kan <sup>r</sup> | Invitrogen                      |
| pEM7     | pUC <i>ori bla sh ble</i> ; Amp <sup>r</sup> , Zeo <sup>r</sup>         | Invitrogen Life Technology, USA |
| pUC18    | <i>ori</i> pMB <i>lacZα bla</i> Amp <sup>r</sup>                        | Laboratory collection           |
| pUC4K    | ColE1 <i>lacZα bla aph</i> ; Amp <sup>r</sup> , Kan <sup>r</sup>        | Laboratory collection           |
| pFX497   | <i>repA, OriT-RP4, bla</i> , low copy no vector; Amp <sup>r</sup> ,     | Laboratory collection           |
| pBD50    | pKAS32:: <i>lacZvcUp-Dwn</i>                                            | Laboratory collection           |
| pBD56    | pSW23T:: <i>CTXφ</i> <sup>ET</sup> , Cam <sup>r</sup>                   | (3)                             |
| pBD60    | pSW23T:: <i>xbs CTXφ</i> , Cam <sup>r</sup>                             | (4)                             |
| pBD61    | pBD60 $\Delta$ <i>cat</i> :: <i>sh ble</i> , Zeo <sup>r</sup>           | (4)                             |
| pBD66    | pBD62 $\Delta$ <i>attP</i> *, Zeo <sup>r</sup>                          | (4)                             |
| pBS52    | pKAS32:: <i>AlexA::aphI</i> , Amp <sup>r</sup> , Kan <sup>r</sup>       | (3)                             |
| pBS22    | pSW23T:: <i>RS2 (Classical)</i> , Cam <sup>r</sup>                      | (5)                             |
| pBS66    | pSW23T:: <i>RS2 (El Tor)</i> , Cam <sup>r</sup>                         | (5)                             |
| pMEV30   | pSW23T:: <i>RS1 (El Tor)</i> , Cam <sup>r</sup>                         | (5)                             |
| pBS73    | pSW23T:: <i>VGJφ</i> , Cam <sup>r</sup>                                 | (6)                             |
| pBS90    | pSW23T:: <i>TLCφ</i> , Cam <sup>r</sup>                                 | (7)                             |
| pDA2     | pDS132:: <i>UprecA-DwnrecA (N16961)</i> , Cam <sup>r</sup>              | (3)                             |
| pAP7     | pSW23T:: <i>RS2</i> <sup>Env</sup> ( <i>VCE232</i> )                    | This study                      |
| pAP8     | pDA2:: <i>aph</i> , Kan <sup>r</sup>                                    | This study                      |
| pAP9     | pSW23T:: <i>RS2</i> <sup>O139</sup> ( <i>SG24</i> )                     | This study                      |
| pAP10    | pBD56:: $\Delta$ <i>cat:bla</i> , Amp <sup>r</sup>                      | This study                      |
| pAP16    | pDS132:: <i>UprecA-aph-DwnrecA (O395)</i> , Kan <sup>r</sup>            | This study                      |
| pAP17    | pDS132:: <i>UplexA-aph-DwnlexA</i> , Kan <sup>r</sup>                   | This study                      |
| pAP18    | pCR2.1:: <i>RS2</i> <sup>ET</sup> , Amp <sup>r</sup>                    | This study                      |
| pAP21    | pBS66:: <i>rstA</i> *, Cam <sup>r</sup>                                 | This study                      |
| pAP24    | pAP21:: $\Delta$ <i>cat:sh ble</i> , Zeo <sup>r</sup>                   | This study                      |

|          |                                                                                                                           |            |
|----------|---------------------------------------------------------------------------------------------------------------------------|------------|
| pSB29    | pSW23T:: <i>up-dw VC0177</i> , Cam <sup>r</sup>                                                                           | This study |
| pSB30    | pSB29:: <i>sacB-cat</i> , Cam <sup>r</sup> , Suc <sup>s</sup>                                                             | This study |
| pSB31    | pKAS32:: <i>VC0177-sacB-cat-VC0178</i> , Amp <sup>r</sup> , Cam <sup>r</sup> , Suc <sup>s</sup> , Strp <sup>s</sup>       | This study |
| pSB32    | pSW23T:: <i>up-dw VC1796</i> , Cam <sup>r</sup>                                                                           | This study |
| pSB33    | pSB32:: <i>sacB-cat</i> , Cam <sup>r</sup> , Suc <sup>s</sup>                                                             | This study |
| pSB34    | pKAS32:: <i>VC01796-sacB-cat-VC01797</i> , Amp <sup>r</sup> , Cam <sup>r</sup> , Suc <sup>s</sup> , Strp <sup>s</sup>     | This study |
| pSB35    | pSW23T:: <i>up-dw VC0828</i> , Cam <sup>r</sup>                                                                           | This study |
| pSB36    | pSB35:: <i>sacB-cat</i> , Cam <sup>r</sup> , Suc <sup>s</sup>                                                             | This study |
| pSB37    | pKAS32:: <i>VC0827-sacB-cat-VC0828</i> , Amp <sup>r</sup> , Cam <sup>r</sup> , Suc <sup>s</sup> , Strp <sup>s</sup>       | This study |
| pSB43    | pSB37:: <i>lacZ<sub>Ec</sub></i> , Amp <sup>r</sup> , Cam <sup>r</sup> , Suc <sup>s</sup> , Strp <sup>s</sup>             | This study |
| pSB44    | pSB34:: <i>lacZ<sub>Ec</sub></i> , Amp <sup>r</sup> , Cam <sup>r</sup> , Suc <sup>s</sup> , Strp <sup>s</sup>             | This study |
| pBIP13   | pSW23T:: <i>VC0500</i> , Cam <sup>r</sup>                                                                                 | This study |
| pBIP15   | pSW23T:: <i>UpVC0500-DwVC0500</i> , Cam <sup>r</sup>                                                                      | This study |
| pBIP17   | pSW23T:: <i>UpVC0500-sacB-cat-DwVC0500</i> , Cam <sup>r</sup> , Suc <sup>s</sup>                                          | This study |
| pBIP38   | pKAS32:: <i>upVC0500-sacB-cat-dwVC0500</i> , Amp <sup>r</sup> , Cam <sup>r</sup> , Suc <sup>s</sup> , Strp <sup>s</sup>   | This study |
| pMEV78   | pDS132 <i>Updif1-lacZ::dif1-Dwndif1</i> ; Cmr                                                                             | (5)        |
| pJV39.02 | pSW23T: Integration module of VSP-I                                                                                       | This study |
| pJV40.02 | pSW23T: Integration module of VSP-II                                                                                      | This study |
| pJV42    | pSW23T: Integration module of VPI-2                                                                                       | This study |
| pJV45    | pSW23T: Integration module of VPI-1                                                                                       | This study |
| pJV37    | pSW23T: Integration module of SXT                                                                                         | This study |
| pSM19    | pBD61ΔXBS:: <i>sacB-cat,rpsL</i> , unique MCS, Zeo <sup>r</sup> , Cam <sup>r</sup> , Suc <sup>s</sup> , Strp <sup>s</sup> | This study |
| pJV36    | pKAS32: <i>UpmosT-sacB:aadA-DwnmosT(MO10)</i> , Zeo <sup>r</sup> , Cam <sup>s</sup>                                       | This study |

382  
383  
384  
385

386 **Table S2.** Conjugation and replication efficiency of different CTX $\Phi$  and its  
 387 derivatives in O1 El Tor, classical and environmental *Vibrio cholerae* strains

| <b>Bacterial strain</b> | <b>Phage or its derivative</b> | <b>Infection and replication efficiency<br/>(Mean <math>\pm</math> SD)</b> |
|-------------------------|--------------------------------|----------------------------------------------------------------------------|
| N16961                  | pBS66                          | $2.44 \times 10^4 \pm 2.27E+04$                                            |
| N16961                  | pBS22                          | $3.32 \times 10^5 \pm 1.82E+05$                                            |
| BS1                     | pBD56                          | $4.82 \times 10^6 \pm 3.47E+06$                                            |
| BS1                     | pBS66                          | $6.39 \times 10^5 \pm 6.34E+05$                                            |
| BS1                     | pBS22                          | $3.8 \times 10^4 \pm 3.56E+04$                                             |
| BS1                     | pAP7                           | $1.53 \times 10^6 \pm 2.22E+06$                                            |
| BS1                     | pMEV30                         | $3.14 \times 10^6 \pm 2.05E+06$                                            |
| BS1                     | pAP10:pBD56                    | $3.6 \times 10^4 \pm 1.65E+04$                                             |
| BS1                     | pAP10:pBS66                    | $1.58 \times 10^5 \pm 2.18E+05$                                            |
| BS1                     | pAP10:pBS22                    | $6.19 \times 10^4 \pm 6.26E+04$                                            |
| BS1                     | pAP10:pMEV30                   | $5.45 \times 10^4 \pm 4.33E+04$                                            |
| BS11                    | pBD56                          | $6.68 \times 10^4 \pm 4.37E+04$                                            |
| BS11                    | pBS66                          | $5.1 \times 10^5 \pm 4.37E+05$                                             |
| BS11                    | pBS22                          | $1.22 \times 10^5 \pm 2.42E+04$                                            |
| BS11                    | pAP7                           | $1.037E+006 \pm 1.264E+006$                                                |
| AP7                     | pBD56                          | $0.0 \pm 0.0$                                                              |
| AP7                     | pBS66                          | $0.0 \pm 0.0$                                                              |
| AP7                     | pBS22                          | $4.64 \times 10^5 \pm 1.29E+05$                                            |
| AP7                     | pAP7                           | $2.15 \times 10^5 \pm 2.91E+05$                                            |
| BS11                    | pAP10:pBD56                    | $0.0 \pm 0.0$                                                              |
| O395                    | pBS66                          | $1.423E+006 \pm 1.253E+006$                                                |
| AP10                    | pBS66                          | $1.86 \times 10^5 \pm 2.11E+05$                                            |
| O395                    | pBS22                          | $1.61 \times 10^4 \pm 1.03E+04$                                            |
| AP10                    | pBS22                          | $0.0 \pm 0.0$                                                              |
| O395                    | pAP7                           | $2.1 \times 10^5 \pm 2.91E+05$                                             |
| AP10                    | pAP7                           | $1.08 \times 10^5 \pm 7.41E+04$                                            |
| O395                    | pAP9                           | $3.18 \times 10^4 \pm 2.19E+04$                                            |
| AP10                    | pAP9                           | $1.84 \times 10^4 \pm 8.31E+03$                                            |
| VCE232                  | pBS66                          | $7.6 \times 10^4 \pm 9.00E+04$                                             |
| AP8                     | pBS66                          | $5.53 \times 10^3 \pm 8.72E+03$                                            |
| VCE232                  | pBS22                          | $2.56 \times 10^4 \pm 1.03E+04$                                            |
| AP8                     | pBS22                          | $1.1 \times 10^5 \pm 1.30E+05$                                             |

|        |      |                                 |
|--------|------|---------------------------------|
| VCE232 | pAP7 | $1.04 \times 10^4 \pm 2.88E+03$ |
| AP8    | pAP7 | $0.0 \pm 0.0$                   |
| VCE232 | pAP9 | $7.26 \times 10^3 \pm 5.19E+03$ |
| AP8    | pAP9 | $2.73 \times 10^4 \pm 4.16E+03$ |

388

389

390

391

392

393 **Table S3:** Primers used in the present study

394

| Primer Name | Sequences (5'-3')                        | RE site | Use                                                    |
|-------------|------------------------------------------|---------|--------------------------------------------------------|
| 70          | ATGACCATGATTACGGATTC                     | -       | Amplification of <i>lacZ::difI</i> region              |
| 71          | TTTTTGACACCAGACCAAC                      | -       | Amplification of <i>lacZ::difI</i> region              |
| 861         | CGG <b>GCGGCCG</b> CGCTGATTCATCATCCTCAC  | NotI    | Amplification of <i>VC0177</i> – <i>VC0178</i> (VSP-1) |
| 862         | GCG <b>GAGCTC</b> CGACCATCCCTATGAAACTC   | SacI    | Amplification of <i>VC0177</i> – <i>VC0178</i> (VSP-1) |
| 863         | CCG <b>TCGCGA</b> CTCCAGGCAGACTAGCTCTG   | NruI    | Inverse PCR of pSB29                                   |
| 864         | GCG <b>ATGCAT</b> ACCTCAAGCACATAACTAGC   | NsiI    | Inverse PCR of pSB29                                   |
| 865         | CGG <b>GCGGCCG</b> CGGCGGAAGCTGACTAATAC  | NotI    | Amplification of <i>VC0500</i> (VSP-2)                 |
| 866         | GG <b>TCTAGAG</b> TGCTTCGCAAGGCTTTATG    | XbaI    | Amplification of <i>VC0500</i> (VSP-2)                 |
| 867         | GCG <b>ATGCAT</b> GGACTCTCTGAACAACCTCGC  | NsiI    | Inverse PCR of pBIP13                                  |
| 868         | CCG <b>CTCGAG</b> TGTAGCACTAGGGTTACTAG   | XhoI    | Inverse PCR of pBIP13                                  |
| 869         | CCG <b>TCGCGA</b> AGCCATGACCCGGGAATTAC   | NruI    | Amplification of <i>sacB cat</i> region from pDS132    |
| 870         | GCG <b>ATGCAT</b> CACATATACCTGCCGTTAC    | NsiI    | Amplification of <i>sacB cat</i> region from pDS132    |
| 871         | CCG <b>CTCGAG</b> AGCCATGACCCGGGAATTAC   | XhoI    | Amplification of <i>sacB cat</i> region from pDS132    |
| 890         | ATCGCTCTGGAGTGAATACC                     | -       | VSP-1- <i>sacB cat</i> tagged strain conformation      |
| 891         | GTTGCCATATCGCGAAAGAC                     | -       | VSP-1- <i>sacB cat</i> tagged strain conformation      |
| 908         | GTTTGATCGGCCCTTATAGC                     | -       | VSP -1 deletion confirmation                           |
| 909         | AGTCTCCACTGCGTAGTTTC                     | -       | VSP -1 deletion confirmation                           |
| 910         | CGG <b>GCGGCCG</b> CTTACGCTTAGCCGCGACTTG | NotI    | Amplification of <i>VC1796-VC1797</i> (VPI-2)          |
| 911         | GCG <b>GAGCTC</b> CGCGCCACGTTCTGATCATTG  | SacI    | Amplification of <i>VC1796-VC1797</i> (VPI-2)          |

|      |                                                 |       |                                                                      |
|------|-------------------------------------------------|-------|----------------------------------------------------------------------|
| 912  | CCG <b><u>TCGCGA</u></b> ACTCGTGTTGCTAGCTCATG   | NruI  | Inverse PCR of pSB32                                                 |
| 913  | GCG <b><u>ATGCAT</u></b> GTGATGCGAGTATTCGCTTG   | NsiI  | Inverse PCR of pSB32                                                 |
| 925  | CGCACGTTCCACAAGTTCAG                            | -     | VPI- 2 <i>sacB cat</i> tagged strain conformation                    |
| 926  | CCTAAGCGCAGTATGGAAGC                            | -     | VPI- 2 <i>sacB cat</i> tagged strain conformation                    |
| 927  | TGGACGAGTTGAGTTCTAGG                            | -     | VSP- II <i>sacB cat</i> tagged strain conformation                   |
| 928  | GAAGACGCGATAAGTGAGTG                            | -     | VSP- II <i>sacB cat</i> tagged strain conformation                   |
| 947  | CGG <b><u>GCGGCCG</u></b> CAAAGCACTTTGGCCTCATGG | NotI  | Amplification of VC0826 – VC0829 (VPI-1)                             |
| 948  | GCG <b><u>GAGCTC</u></b> TAACATAACCCGCGAGCATCG  | SacI  | Amplification of VC0826 – VC0829 (VPI-1)                             |
| 949  | CCG <b><u>TCGCGA</u></b> GTGAATGTTGCACGTGTTTC   | NruI  | Inverse PCR of pSB35                                                 |
| 950  | CCG <b><u>CTCGAG</u></b> AGCGCCTACTCGTCACAGAC   | XhoI  | Inverse PCR of pSB35                                                 |
| 951  | CCG <b><u>CTCGAG</u></b> CACATATACCTGCCGTTAC    | XhoI  | Amplification of <i>sacB cat</i> region from pDS132                  |
| 1119 | GCTGGTACTGGTGGGTATTGTG                          | -     | SXT specific primers                                                 |
| 1120 | CGAAGCGCGGATGCTCTACTC                           | -     | SXT specific primers                                                 |
| 1046 | CTCTATGGGCACTGTCCACATT                          | -     | SXT specific primers                                                 |
| 1076 | <b><u>GCGGCCGC</u></b> GTTAGGCAGTTCACCTTAAGG    | Not 1 | <i>s053</i> upstream region amplification                            |
| 1108 | G <b><u>CACTAGT</u></b> CTCTGGCACTGTGATTTG      | SpeI  | <i>s053</i> upstream region amplification                            |
| 1109 | <b><u>GCTAGC</u></b> CCGAGTCCACATAGGACAAC       | NheI  | <i>s053</i> downstream region amplification                          |
| 1110 | G <b><u>CCTCGAG</u></b> GGCCAGTCGTTGTTGAGAAG    | XhoI  | <i>s053</i> downstream region amplification                          |
| 1220 | G <b><u>CCATATG</u></b> CTGCAGGAATTCGATATCAAG   | NdeI  | Inverse PCR to amplify upstream and downstream region of <i>most</i> |
| 1221 | G <b><u>CTCTAGA</u></b> CTTCCCTTAGCTCCTGCCCTATG | XbaI  | Inverse PCR to amplify upstream and downstream region of <i>most</i> |
| 1222 | G <b><u>CTCTAGAG</u></b> CGTATGCGCTCACGCAACTG   | XbaI  | Amplification of Spectinomycin resistance cassette                   |
| 1223 | G <b><u>CCATATG</u></b> AATTATTTGCCGACTACCTTGG  | NdeI  | Amplification of Spectinomycin resistance cassette                   |
| 1232 | CACCTTATCTGAATGCTGCC                            | -     | Amplification of integration module of SXT-outer                     |
| 1233 | GATTCCCTCGCAACGAATGAG                           | -     | Amplification of integration module of SXT-outer                     |

|      |                                         |       |                                                      |
|------|-----------------------------------------|-------|------------------------------------------------------|
| 1234 | <b>CGCTGCAG</b> CTGATTATGAGAGTTGTCGTC   | PstI  | Amplification of integration module of SXT-inner     |
| 1235 | G <b>CTCTAGAT</b> TCAATGGCACGGCGGAGATG  | XbaI  | Amplification of integration module of SXT-inner     |
| 1247 | G <b>CGCGGCCGC</b> GTATTGTCATATCTAGTCTG | NotI  | Amplification of integration module of VPI-2         |
| 1248 | G <b>CACTAGT</b> CAGATTAGCTAACCTATTGG   | SpeI  | Amplification of integration module of VPI-2         |
| 1251 | G <b>CGCGGCCGC</b> TCCTAAAGGGCACCTAGTTG | NotI  | Amplification of integration module of VSP-II        |
| 1252 | G <b>CACTAGT</b> CCATAGAATGGAGTTCAGAG   | SpeI  | Amplification of integration module of VSP-II        |
| 1259 | G <b>CACTAGT</b> TCAATGGCACGGCGGAGATG   | SpeI  | Amplification of integration module of SXT           |
| 1260 | G <b>CGCGGCCGC</b> TCTGCTCTTTGAGCGGAATG | NotI  | Amplification of integration module of VPI-2 (inner) |
| 1261 | G <b>CACTAGT</b> CAATAAGTATGAATCGATATC  | SpeI  | Amplification of integration module of VPI-2 (inner) |
| 1289 | G <b>GGAATTC</b> TGCATACATCATCGACCAG    | EcoRI | Amplification of integration module of VSP-I         |
| 1290 | <b>CCGAGCTC</b> CAACATGAAGTAGGCGGCAC    | SacI  | Amplification of integration module of VSP-I         |
| 1304 | ACTATGATTTGGTGGAGCTGGGGTAAGTTGA         | -     | Amplification of <i>attP</i> VPI-1                   |
| 1305 | TCAACTTACCCAGCTCCACCAAATCATAGT          | -     | Amplification of <i>attP</i> VPI-1                   |
| 1306 | ACTAGTGATTGGTGGGCTGGGGGAGTTGA           | -     | Amplification of <i>attB</i> VPI-1                   |
| 1307 | TCAACTCCCCAGCCCACCAATCACTAGT            | -     | Amplification of <i>attB</i> VPI-1                   |

395

396 RE=Restriction Enzyme

397

398

399

400

401

402

403

404

405

406



407 **Supplementary References:**

- 408 1. Skorupski, K. & Taylor, R. K. Positive selection vectors for allelic exchange. *Gene*  
409 **169**, 47-52 (1996).
- 410 2. Demarre, G. *et al.* A new family of mobilizable suicide plasmids based on broad  
411 host range R388 plasmid (IncW) and RP4 plasmid (IncPalph) conjugative  
412 machineries and their cognate Escherichia coli host strains. *Res. Microbiol.* **156**, 245-  
413 255, doi:10.1016/j.resmic.2004.09.007 (2005).
- 414 3. Pant, A. *et al.* Effect of LexA on Chromosomal Integration of CTXvarphi in *Vibrio*  
415 *cholerae*. *J. Bacteriol.* **198**, 268-275, doi:10.1128/JB.00674-15 (2016).
- 416 4. Das, B. *et al.* A novel, broad-range, CTXPhi-derived stable integrative expression  
417 vector for functional studies. *J. Bacteriol.* **196**, 4071-4080, doi:10.1128/JB.01966-14  
418 (2014).
- 419 5. Das, B., Bischerour, J., Val, M. E. & Barre, F. X. Molecular keys of the tropism of  
420 integration of the cholera toxin phage. *Proceedings of the National Academy of*  
421 *Sciences of the United States of America* **107**, 4377-4382,  
422 doi:10.1073/pnas.0910212107 (2010).
- 423 6. Das, B., Bischerour, J. & Barre, F. X. VGJphi integration and excision mechanisms  
424 contribute to the genetic diversity of *Vibrio cholerae* epidemic strains. *Proceedings of*  
425 *the National Academy of Sciences of the United States of America* **108**, 2516-2521,  
426 doi:10.1073/pnas.1017061108 (2011).
- 427 7. Midonet, C., Das, B., Paly, E. & Barre, F. X. XerD-mediated FtsK-independent  
428 integration of TLCvarphi into the *Vibrio cholerae* genome. *Proceedings of the*  
429 *National Academy of Sciences of the United States of America* **111**, 6,  
430 doi:10.1073/pnas.1404047111 (2014).

431

432
